# Supplementary material for: Temperature increase drives critical slowing down of fish ecosystems
Source: PLOS journal article supplement (doi:10.1371/journal.pone.0246222), 2021-10-20
Supplement: S5 (10.1371/journal.pone.0246222.s005) [file journal.pone.0246222.s005]

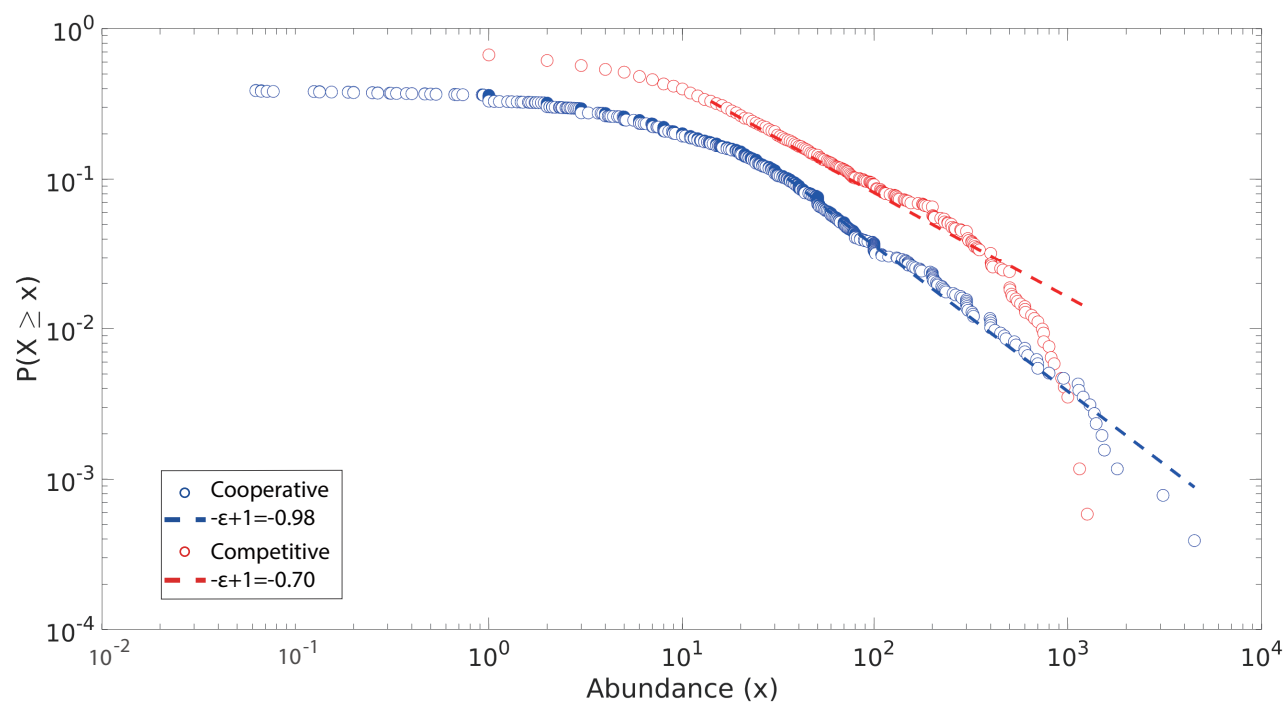

Figure S2:
